# Supplementary material for: A Promising Process to Remove Nitrate from Solar Panel Production Wastewater and Meanwhile Generating Electricity
Source: MDPI journal article supplement (doi:10.3390/w15193347), 2023-09-24
Supplement: s1 [file s1]

Archive with 1 entries (1 files):
- water-2573771-supplementary.pdf
